# Supplementary material for: Comparison by Race of Conservative Management for Low-Risk and Intermediate-Risk Prostate Cancers in Veterans From 2004 to 2018
Source: PubMed Central journal article supplement (PMC7522702; doi:10.1001/jamanetworkopen.2020.18318), 2020-09-28
Supplement: jamanetwopen-e2018318-s001.pdf [file jamanetwopen-e2018318-s001.pdf]

## Supplementary Online Content

Parikh RB, Robinson KW, Chhatre S, et al. Comparison by race of conservative management for low-risk and intermediate-risk prostate cancers in veterans from 2004 to 2018. *JAMA Network Open*. 2020;3(9):e2018318. doi:10.1001/jamanetworkopen.2020.18318

**eFigure 1.** Cohort Selection

**eFigure 2.** Observed Trends in Receipt of Conservative Management Among Veterans With Localized Prostate Cancer

**eFigure 3.** Sensitivity Analysis of Time to Receipt of Definitive Therapy

**eTable 1.** Code List

**eTable 2.** Initial Management Strategy Over Time

**eTable 3.** Univariable Log-Binomial Associations of Likelihood of Receipt of Conservative Management Across Patients With Low-Risk and Intermediate-Risk

This supplementary material has been provided by the authors to give readers additional information about their work.

**eFigure 1. Cohort Selection**

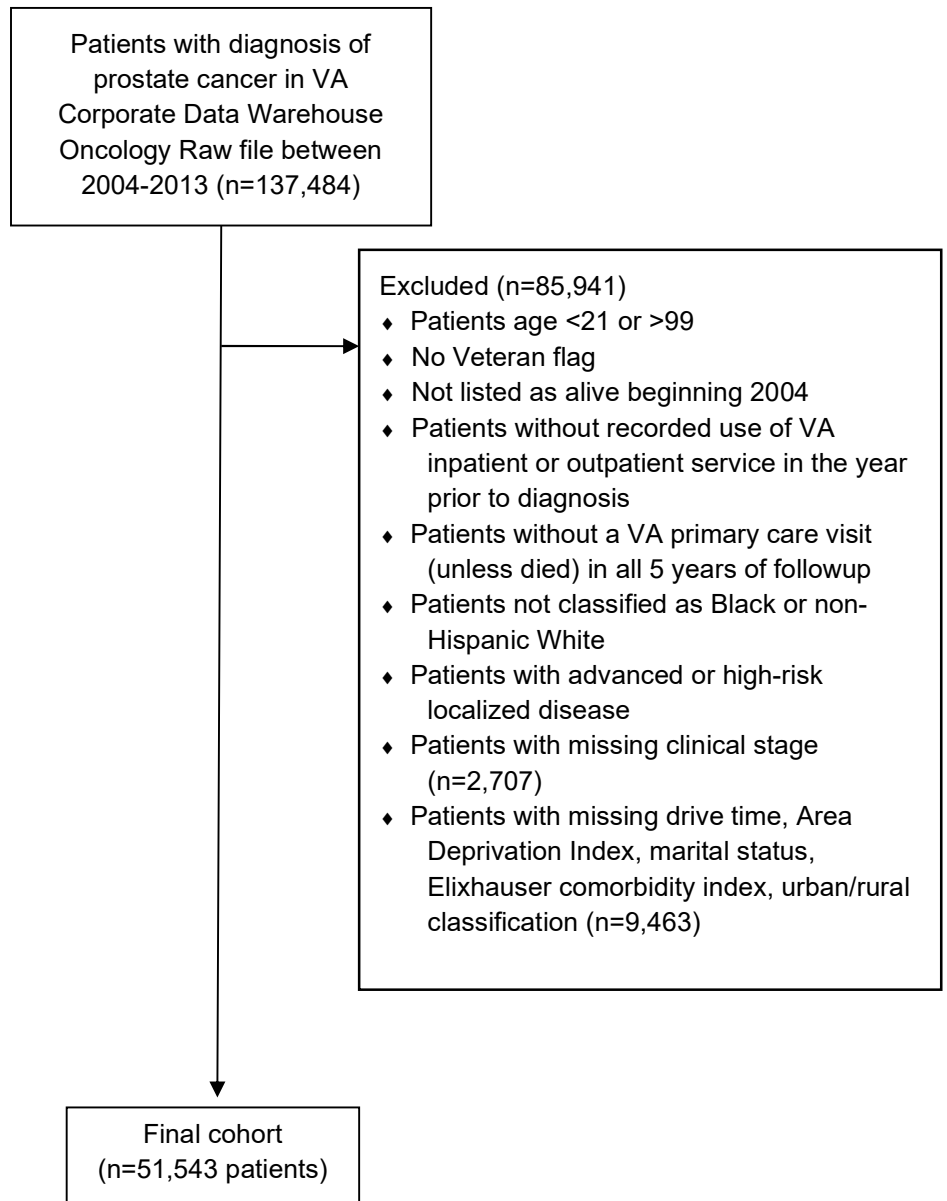

**eFigure 2.** Observed Trends in Receipt of Conservative Management Among Veterans With Localized Prostate Cancer

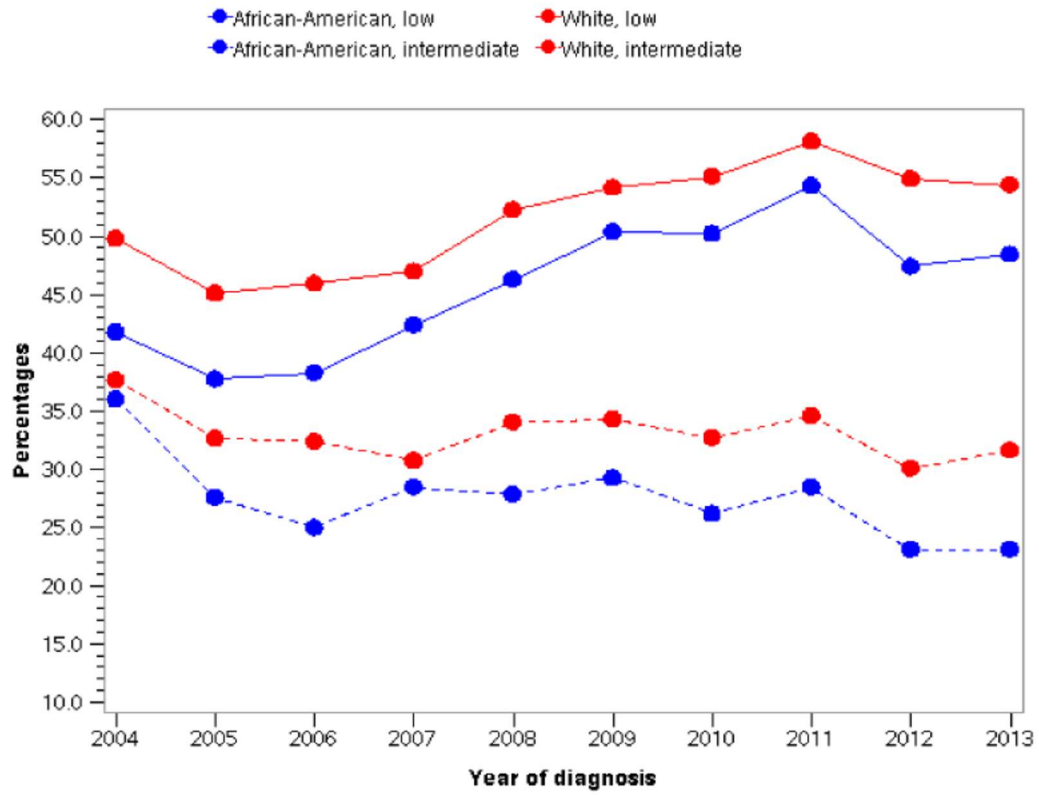

**eFigure 3.** Sensitivity Analysis of Time to Receipt of Definitive Therapy

**eFigure 3A.** Kaplan Meier curve of time to receipt of definitive therapy among African-American and White Veterans with low-risk localized prostate cancer who receive conservative management, 2004-2018, Sensitivity analysis

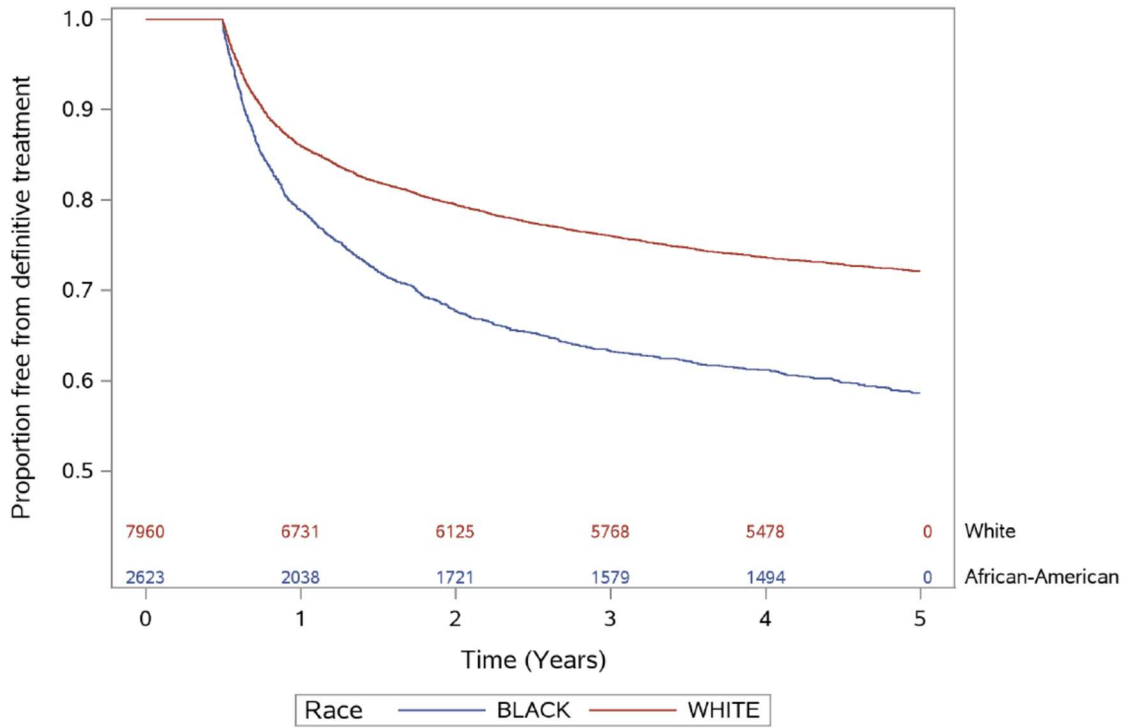

**eFigure 3B.** Kaplan Meier curve of time to receipt of definitive therapy among African-American and White Veterans with intermediate-risk localized prostate cancer who receive conservative management, 2004-2018, Sensitivity analysis

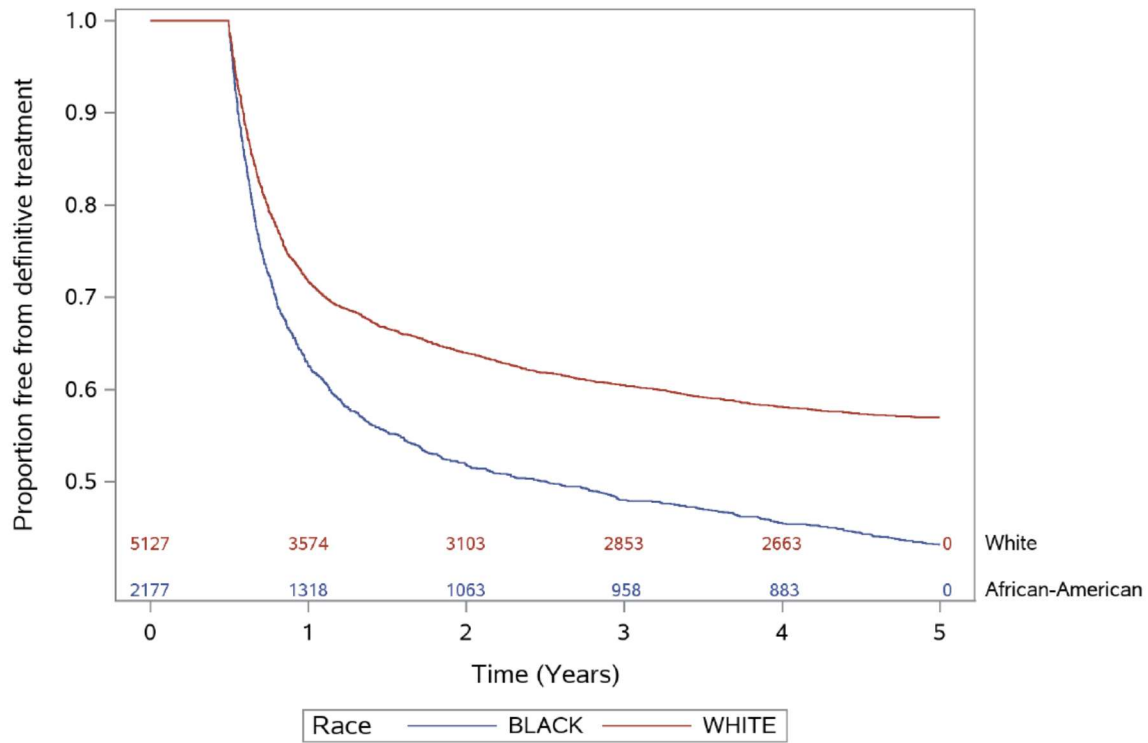

**eTable 1. Code List**

| Variable        | ICD-9 diagnosis/procedure code   | CPT                                                          | HCPCS codes                                                                                                                                                                      |
|-----------------|----------------------------------|--------------------------------------------------------------|----------------------------------------------------------------------------------------------------------------------------------------------------------------------------------|
| Prostatectomy   | 60.5                             | 55810-55815,<br>55821, 55831,<br>55840-55845,<br>55866       |                                                                                                                                                                                  |
| Radiation       | V58, V66.1, V67.1;<br>92.2-92.29 | 55869-55876,<br>77261-77431,<br>77499, 77522,<br>77720-77799 | C1164-C11674,<br>C1325, C1350,<br>C1700-1806,<br>C23632-C2643,<br>G0174, G0256,<br>G0261                                                                                         |
| Hormone Therapy | V07.59; 62.4x                    | 54520, 54522,<br>54530, 54690                                | C9216, C9430,<br>G03056, G9132,<br>J0128, J1050,<br>J1051, J1675,<br>J1950, J3315,<br>J9155, J9165,<br>J9202, J9217-<br>J9219, J9225-<br>J9226, S0133,<br>S0165, S0175,<br>S9560 |

**eTable 2.** Initial Management Strategy Over Time

| Intermediate risk (n = 27514) |                             |             |              |                         |              |              |
|-------------------------------|-----------------------------|-------------|--------------|-------------------------|--------------|--------------|
|                               | African-American (n = 8526) |             |              | White (n = 18988)       |              |              |
|                               | Conservative management     | Surgery     | Radiation    | Conservative management | Surgery      | Radiation    |
| 2004-2007                     | 721 (28.7%)                 | 560 (22.3%) | 993 (39.6%)  | 2073 (33.0%)            | 1375 (21.9%) | 2220 (35.2%) |
| 2008-2011                     | 1046 (28.0%)                | 910 (24.3%) | 1535 (41.0%) | 2817 (33.9%)            | 1899 (22.9%) | 3046 (36.7%) |
| 2012-2013                     | 525 (23.1%)                 | 546 (24.0%) | 1104 (48.5%) | 1355 (30.1%)            | 1032 (23.5%) | 1805 (41.1%) |
| Low risk (n = 24029)          |                             |             |              |                         |              |              |
|                               | African-American (n = 6304) |             |              | White (n = 17725)       |              |              |
|                               | Conservative management     | Surgery     | Radiation    | Conservative management | Surgery      | Radiation    |
| 2004-2007                     | 923 (40.1%)                 | 330 (14.3%) | 946 (41.1%)  | 3228 (46.9%)            | 946 (13.7%)  | 2428 (35.3%) |
| 2008-2011                     | 1304 (50.3%)                | 297 (11.5%) | 931 (35.9%)  | 4065 (54.9%)            | 829 (11.2%)  | 2346 (31.7%) |
| 2012-2013                     | 675 (47.9%)                 | 118 (8.4%)  | 592 (42.0%)  | 1874 (54.7%)            | 298 (8.7%)   | 1216 (35.5%) |

**eTable 3.** Univariable Log-Binomial Associations of Likelihood of Receipt of Conservative Management Across Patients With Low-Risk and Intermediate-Risk

| Characteristic                         | RR (95% CI)          | p-value |
|----------------------------------------|----------------------|---------|
| Age at diagnosis                       | 1.015 (1.014-1.017)  | <0.001  |
| Absolute PSA                           | 0.982 (0.980-0.986)  | <0.001  |
| Area Deprivation Index                 | 0.999 (0.998-0.999)  | <0.001  |
| Driving time                           | 1.011 (1.009-1.014)  | <0.001  |
| Elixhauser comorbidity index (ordinal) | 1.249 (1.164-1.340)  | <0.001  |
| Urban/rural                            | 1.063 (1.041-1.086)  | <0.001  |
| <b>Race</b>                            |                      |         |
| African-American                       | 0.834 (0.814-0.855)  | <0.001  |
| White                                  | 1.0 [ref]            |         |
| <b>Marital status</b>                  |                      |         |
| Married                                | 1.083 (1.060 -1.106) | <0.001  |
| Single/Divorced                        | 1.0 [ref]            |         |
